# Supplementary material for: The Impact of Open Pollination on the Structural Evolutionary Dynamics, Meiotic Behavior, and Fertility of Resynthesized Allotetraploid Brassica napus L
Source: PubMed Central journal article supplement (PMC5295613; doi:10.1534/g3.116.036517), 2016-12-21
Supplement: 705FigureS1.pdf [file 705FigureS1.pdf]

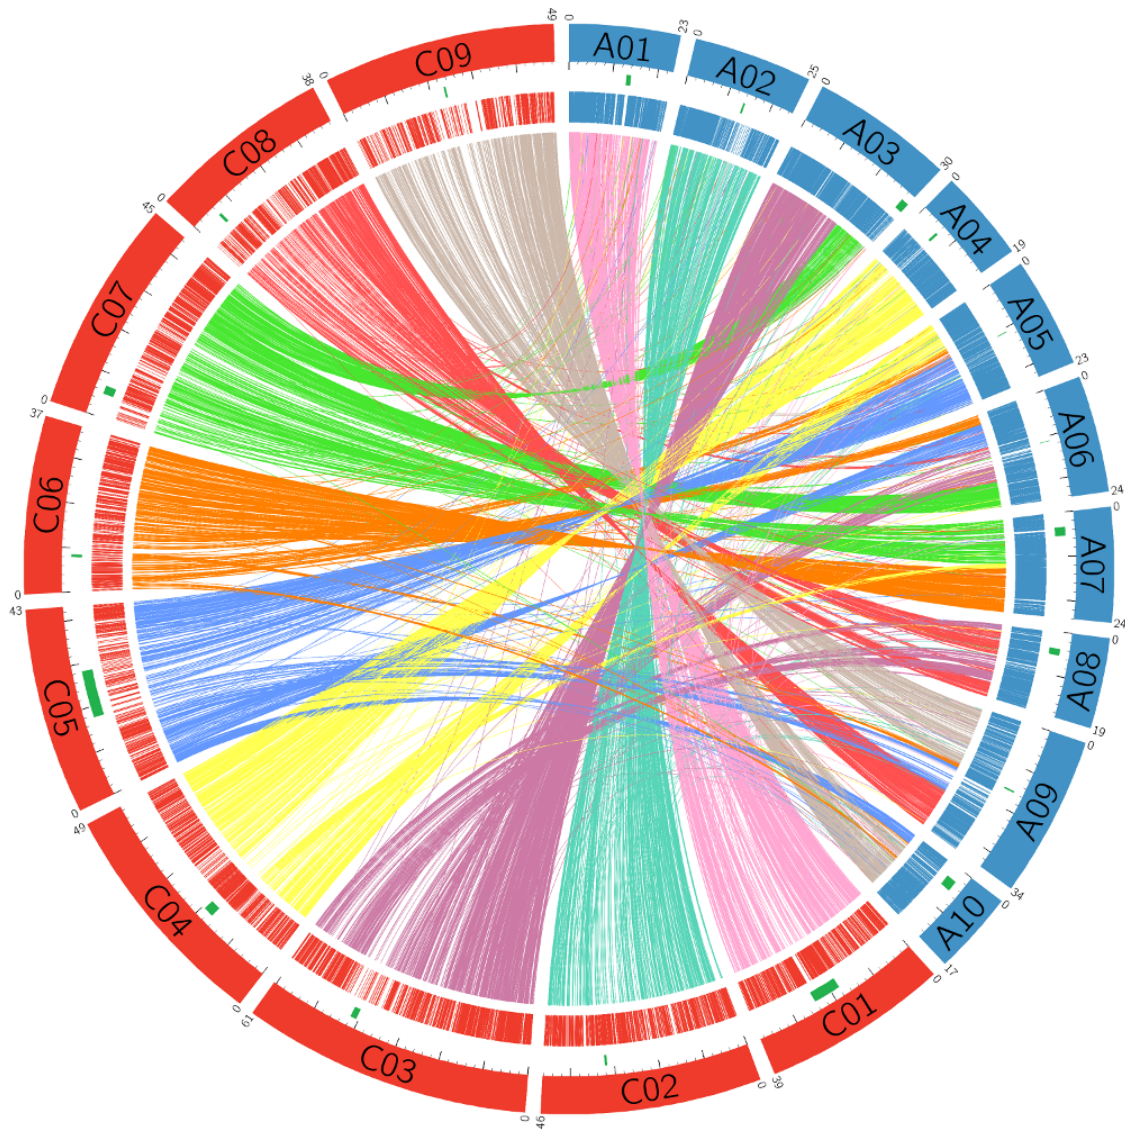

**Supplemental Figure S1** Positions of the 60K SNP markers on *B. napus* Darmor chromosomes (Chalhoub *et al.* 2014). *B. napus* chromosomes belonging to the A and C subgenomes are shown in blue and red, respectively. The size of each chromosome (in Mbp) is indicated above each chromosome, and a ruler is drawn underneath each chromosome with larger and smaller tick marks every 10 and 2 Mbp, respectively. The locations of active centromeres (Mason *et al.* 2016) are indicated by green rectangles under each chromosome. The bars indicate the SNP markers for which a single hit on the A or C subgenome was obtained using the *B. napus* Darmor genome sequence (Chalhoub *et al.* 2014). The links indicate the markers for which a single hit on the A and C *B. napus* subgenome was obtained.
